# Supplementary material for: Hepatoprotection of Mentha aquatica L., Lavandula dentata L. and Leonurus cardiaca L
Source: PubMed Central journal article supplement (PMC6719046; doi:10.3390/antiox8080267), 2019-08-02
Supplement: antioxidants-08-00267-s001.pdf [file antioxidants-08-00267-s001.pdf]

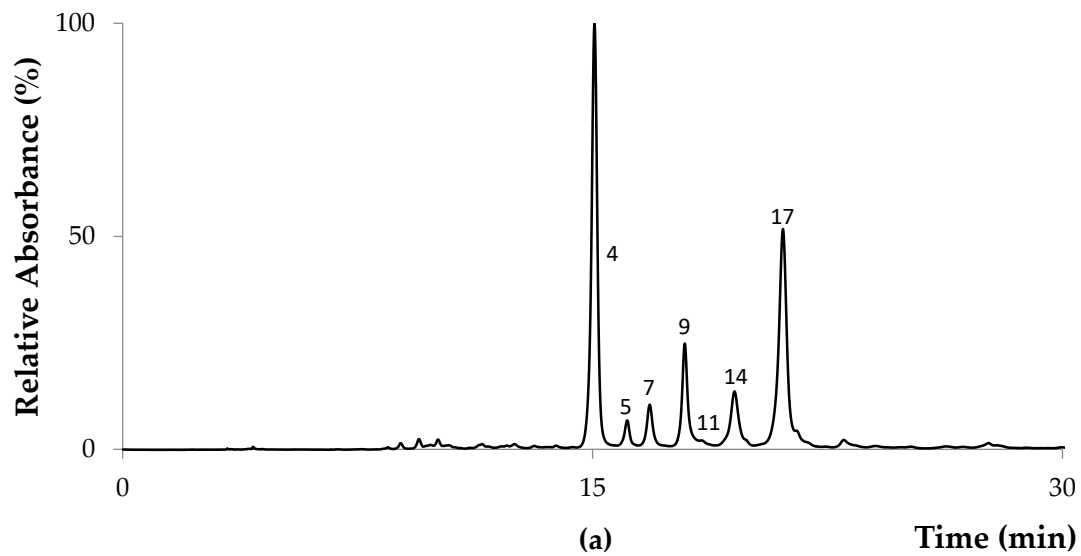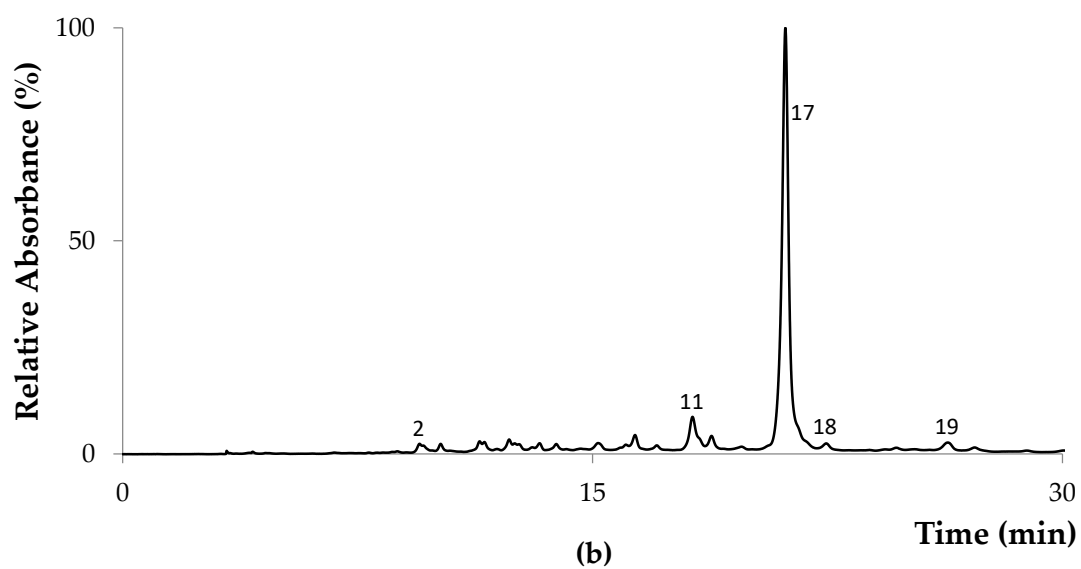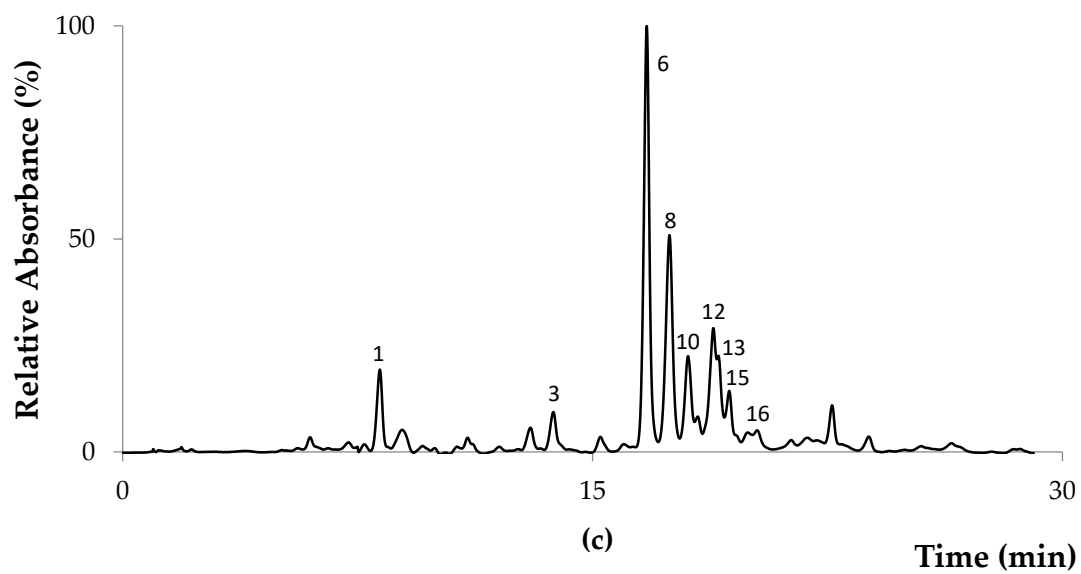

**Figure 1.** Chromatographic representation of *Mentha aquatica* (a), *Lavandula dentata* (b) (both at 280 nm) and *Leonurus cardiaca* (c) (at 340 nm) ethanolic extracts. Numbers in the figure correspond to the UHPLC-DAD-ESI-MS<sup>n</sup> peaks described in Table 2.

**Table 1.** Linearity, LOD and LOQ of standard compounds used as references.

| Standard Compound | Range concentration (µg/mL) | n <sup>a</sup> | Slope <sup>b</sup> (area counts/mg) | Intercept <sup>b</sup> (area counts /mg) | R <sup>2</sup> | LOD (µg/mL) | LOQ (µg/mL) |
|-------------------|-----------------------------|----------------|-------------------------------------|------------------------------------------|----------------|-------------|-------------|
| E-7O-G            | 10 - 136                    | 5              | 1106(±10) × 10 <sup>4</sup>         | 34(±8) × 10 <sup>3</sup>                 | 0.9995         | 5.6         | 16.9        |
| N-7O-G            | 5 - 68                      | 5              | 136(±1) × 10 <sup>5</sup>           | 2(±4) × 10 <sup>3</sup>                  | 0.9991         | 2.7         | 8.1         |
| L-7O-G            | 45 - 473                    | 5              | 385(±10) × 10 <sup>4</sup>          | 7(±2) × 10 <sup>4</sup>                  | 0.9945         | 40.6        | 123.2       |
| RA                | 15 - 173                    | 5              | 143(±1) × 10 <sup>5</sup>           | -10(±1) × 10 <sup>4</sup>                | 0.9992         | 6.4         | 19.3        |
| Verb              | 44 - 700                    | 5              | 166(±2) × 10 <sup>4</sup>           | 6(±7) × 10 <sup>3</sup>                  | 0.9985         | 31.9        | 96.7        |
| Q-7O-R            | 12-200                      | 5              | 48(±1) × 10 <sup>5</sup>            | -3(±8) × 10 <sup>3</sup>                 | 0.9981         | 14.4        | 43.6        |

E-7O-G, eriodictyol-7-*O*-glucoside; N-7O-G, naringenin-7-*O*-glucoside; L-7O-G, luteolin-7-*O*-glucoside; RA, rosmarinic acid; Verb, verbascoside; Q-7O-R, quercetin -7-*O*-rutinoside

<sup>a</sup> Number of points used for the regression of standard solutions. Injections were done in triplicate.

<sup>b</sup> The standard deviation in the slope and intercept of the regression line is shown in parenthesis
